# Supplementary material
Source: publisher figshare collection journal article supplement (https://sage.figshare.com/ndownloader/files/20098388)
Supplement: Supplementary file 1 [file 20098388]

## **Appendix C: Response Categorization**

### **Positive**

1. Very comfortable – capable – helpful - satisfied
2. Somewhat comfortable – capable – helpful – satisfied
3. Yes

### **Negative**

1. Very uncomfortable – incapable – unhelpful - unsatisfied
2. Somewhat uncomfortable – incapable – unhelpful - unsatisfied
3. No
